# Supplementary material
Source: PubMed Central journal article supplement (PMC2840851)
Supplement: jc.2009-1304_1.pdf [file jc.2009-1304_1.pdf]

**Supplemental Table 1: Amount of FSH (IU)<sup>a</sup> received classified by ovarian response and age**

| Age   | FSH received                  | Ovarian response               |                              |                              |
|-------|-------------------------------|--------------------------------|------------------------------|------------------------------|
|       | All patients                  | Low                            | Intermediate                 | High                         |
| < 35  | 2649 ± 110 (121) <sup>e</sup> | 3271 ± 377 (21) <sup>b,c</sup> | 2711 ± 142 (60) <sup>b</sup> | 2231 ± 141 (40) <sup>b</sup> |
| 35-37 | 3637 ± 223 (64) <sup>e</sup>  | 4724 ± 512 (20) <sup>b,d</sup> | 3358 ± 233 (30) <sup>b</sup> | 2682 ± 280 (14) <sup>b</sup> |
| 38-40 | 4259 ± 269 (54) <sup>e</sup>  | 5453 ± 422 (24) <sup>b,d</sup> | 3441 ± 289 (20) <sup>b</sup> | 3030 ± 392 (10) <sup>b</sup> |
| > 40  | 4008 ± 275 (28) <sup>e</sup>  | 3461 ± 678 (7)                 | 3977 ± 401 (12)              | 4475 ± 417 (9)               |

<sup>a</sup> Mean ± SEM, number of patients is shown in parentheses

<sup>b</sup> one-way ANOVA within the same age group, p<0.005

<sup>c</sup> significantly different from FSH received by high response group, p<0.01

<sup>d</sup> significantly different from FSH received by intermediate and high response group of same age category, p<0.05

<sup>e</sup> one-way ANOVA, p<0.0001. Amount of FSH received by women ≤ 34 was significantly different to all other age groups (p<0.001).

**Supplemental Table 2**

| <b>Response</b>     | <b>Number of cycles</b> | <b>Number of patients</b> | <b><math>\beta</math>-actin (+)<sup>a</sup></b> | <b>FSHR (+)<sup>b</sup></b> |
|---------------------|-------------------------|---------------------------|-------------------------------------------------|-----------------------------|
| <b>Low</b>          | 13                      | 13                        | 10/13 (77 %)                                    | 5/10 (50 %)                 |
| <b>Inter.</b>       | 17                      | 17                        | 15/17 (88 %)                                    | 10/15 (67 %)                |
| <b>High</b>         | 33                      | 28 <sup>c</sup>           | 29/33 (88 %)                                    | 20/29 (69 %)                |
| <b><u>Total</u></b> | 63                      | 58                        | 54/63 (86 %)                                    | 35/54 (65 %)                |

<sup>a</sup>  $\beta$ -actin RT-PCR was used as a control of RNA quantity and quality

<sup>b</sup> Number of samples positive for  $\beta$ -actin that were also positive for FSHR

<sup>c</sup> 5 patients were treated twice. In all cycles their oocyte number was within the 75 %.
